# Supplementary material for: The Nexus between GHGs Emissions and Clean Growth: Empirical Evidence from Canadian Provinces
Source: MDPI journal article supplement (doi:10.3390/su15032218), 2023-01-25
Supplement: s1 [file s1]

## Supplementary Information

Table S1. Cross-section dependence test [34].

| Variable         |            | AMG    | P-value | CCEM   | P-value |
|------------------|------------|--------|---------|--------|---------|
| GHGs/GDP         | (no trend) | -2.087 | 0.037   | -2.575 | 0.023   |
|                  | (trend)    | -1.648 | 0.099   | -2.281 | 0.000   |
| Carbon Intensity | (no trend) | -1.835 | 0.067   | -1.783 | 0.075   |
|                  | (trend)    | -2.497 | 0.013   | -2.347 | 0.019   |
| Energy Intensity | (no trend) | -1.111 | 0.267   | -0.841 | 0.401   |
|                  | (trend)    | 0.060  | 0.952   | -0.999 | 0.318   |

H0:  $Cov(u_{it}, u_{jt}) = 0$  for all  $t$  and  $i \neq j$ , the null hypothesis is that the cross-sections are independent.

Table S2. 2<sup>nd</sup> Generation Panel Unit Root test (CIPS)- [43].

|          |      | Level    |        |        |        | 1st Difference |        |        |        |               |
|----------|------|----------|--------|--------|--------|----------------|--------|--------|--------|---------------|
|          |      | Constant |        | Trend  |        | Constant       |        | trend  |        |               |
| Variable | lags | Zt-bar   | p. val | Zt-bar | p. val | Zt-bar         | p. val | Zt-bar | p. val | Order of Int. |
| GHGs/GDP | 0    | -1.330   | 0.092  | 0.592  | 0.723  | -9.429         | 0.000  | -8.510 | 0.000  | I(1)          |
|          | 1    | -2.497   | 0.006  | 0.421  | 0.663  | -6.712         | 0.000  | -5.609 | 0.000  | I(0)          |
|          | 2    | -0.514   | 0.304  | 2.462  | 0.993  | -2.900         | 0.002  | -1.923 | 0.027  | I(1)          |
| CI       | 0    | -2.724   | 0.003  | -1.973 | 0.024  | -11.206        | 0.000  | 10.573 | 0.000  | I(0)          |
|          | 1    | -3.052   | 0.001  | -1.102 | 0.135  | -6.418         | 0.000  | -5.522 | 0.000  | I(0)          |
|          | 2    | -2.072   | 0.019  | -0.470 | 0.319  | -4.099         | 0.000  | -2.453 | 0.007  | I(1)          |
| EI       | 0    | -1.376   | 0.084  | 0.546  | 0.707  | -8.001         | 0.000  | -7.382 | 0.000  | I(1)          |
|          | 1    | -2.431   | 0.008  | -1.666 | 0.048  | -5.026         | 0.000  | -3.951 | 0.000  | I(0)          |
|          | 2    | -2.549   | 0.005  | -1.245 | 0.107  | -3.991         | 0.000  | -2.304 | 0.011  | I(0)          |
| GDPpc    | 0    | 0.118    | 0.547  | -0.239 | 0.405  | -6.917         | 0.000  | -5.440 | 0.000  | I(1)          |
|          | 1    | -1.445   | 0.074  | -3.300 | 0.000  | -5.031         | 0.000  | -3.380 | 0.000  | TS            |
|          | 2    | -0.777   | 0.219  | -2.281 | 0.011  | -4.433         | 0.000  | -2.140 | 0.016  | I(1)          |
| GDPpcsq  | 0    | 0.164    | 0.565  | -0.182 | 0.428  | -6.917         | 0.000  | -5.440 | 0.000  | I(1)          |
|          | 1    | -1.402   | 0.080  | -3.266 | 0.001  | -5.031         | 0.000  | -3.380 | 0.000  | TS            |
|          | 2    | -0.705   | 0.241  | -2.245 | 0.012  | -4.433         | 0.000  | -2.140 | 0.016  | TS            |

Notes: The null hypothesis of the Pesaran (2007) test is the homogeneous nonstationary, and the maximum 2 lags are used. Critical values at a 5% level of significance are -2.25 without trend and -2.76 for with trend. CIPS test assumes cross-section dependence is in form of a single unobserved common factor.

Table S3. 1st Generation Maddala and Wu (1999) [35] Panel Unit Root test (MW)

|          |      | Level    |       |        |       | 1st Difference |       |         |       |               |
|----------|------|----------|-------|--------|-------|----------------|-------|---------|-------|---------------|
|          |      | Constant |       | Trend  |       | Constant       |       | trend   |       |               |
| Variable | lags | Zt-bar   | p.val | Zt-bar | p.val | Zt-bar         | p.val | Zt-bar  | p.val | Order of Int. |
| GHGs/GDP | 0    | 4.007    | 1.000 | 32.015 | 0.077 | 219.103        | 0.000 | 172.712 | 0.000 | I(1)          |
|          | 1    | 4.592    | 1.000 | 57.855 | 0.000 | 189.024        | 0.000 | 158.526 | 0.000 | TS            |
|          | 2    | 3.221    | 1.000 | 27.526 | 0.192 | 108.152        | 0.000 | 80.676  | 0.000 | I(1)          |
| CI       | 0    | 17.945   | 0.709 | 34.564 | 0.043 | 306.500        | 0.000 | 288.609 | 0.000 | I(1)          |
|          | 1    | 17.880   | 0.713 | 34.603 | 0.043 | 149.526        | 0.000 | 148.807 | 0.000 | I(1)          |
|          | 2    | 10.803   | 0.977 | 54.480 | 0.000 | 91.400         | 0.000 | 80.088  | 0.000 | TS            |
| EI       | 0    | 22.316   | 0.441 | 25.571 | 0.271 | 209.294        | 0.000 | 190.256 | 0.000 | I(1)          |
|          | 1    | 38.146   | 0.018 | 48.247 | 0.001 | 156.303        | 0.000 | 149.337 | 0.000 | I(0)          |
|          | 2    | 48.904   | 0.001 | 41.460 | 0.007 | 92.041         | 0.000 | 86.801  | 0.000 | I(0)          |
| GDPpc    | 0    | 45.577   | 0.002 | 5.615  | 1.000 | 128.644        | 0.000 | 125.135 | 0.000 | I(0)          |
|          | 1    | 30.455   | 0.108 | 7.223  | 0.999 | 79.418         | 0.000 | 83.568  | 0.000 | I(1)          |
|          | 2    | 33.275   | 0.058 | 4.896  | 1.000 | 36.344         | 0.028 | 38.115  | 0.018 | I(1)          |
| GDPpcsq  | 0    | 43.772   | 0.004 | 5.566  | 1.000 | 128.644        | 0.000 | 125.135 | 0.000 | I(0)          |
|          | 1    | 29.579   | 0.129 | 7.277  | 0.999 | 79.418         | 0.000 | 83.568  | 0.000 | I(1)          |
|          | 2    | 32.149   | 0.075 | 4.854  | 1.000 | 36.344         | 0.028 | 38.115  | 0.018 | I(1)          |

Note: Int. means an order of integration, while TS refer series is trend stationary at level i.e, I(0) and I(1) refer to stationary at 1st difference. While CI is carbon intensity, EI is energy Intensity, GDPpc is GDP per capita while GDPpcsq is GDP per capita square. Null for MW tests: series is I(1). MW test assumes cross-section independence. Critical values at a 5% level of significance are 33.92 without trend and 44.56 for with trend.

**Table S4.** PMG Short-run Provinces wise Results for Carbon Intensity Model (3).

| VARIABLES    | (1)<br>NFL            | (2)<br>PEI              | (3)<br>NS               | (4)<br>NB              | (5)<br>Qc              | (6)<br>Ont              | (7)<br>Man             | (8)<br>Sask           | (9)<br>Alb            | (10)<br>BC             | (11)<br>AT              |
|--------------|-----------------------|-------------------------|-------------------------|------------------------|------------------------|-------------------------|------------------------|-----------------------|-----------------------|------------------------|-------------------------|
| ECT          | -0.606***<br>(0.166)  | -0.471***<br>(0.133)    | -0.474***<br>(0.144)    | -0.319**<br>(0.162)    | -0.406**<br>(0.195)    | -0.514***<br>(0.158)    | -0.406**<br>(0.169)    | -0.116<br>(0.0755)    | -0.248**<br>(0.109)   | -0.105<br>(0.117)      | -0.530***<br>(0.153)    |
| D.lgdpc      | -3.420<br>(13.00)     | 41.84<br>(31.09)        | 68.82<br>(54.21)        | 8.111<br>(68.09)       | -3.626<br>(24.32)      | -54.84**<br>(22.05)     | 4.729<br>(23.56)       | -29.30**<br>(12.89)   | -4.060<br>(11.33)     | 14.03<br>(31.44)       | -11.17<br>(20.44)       |
| D.lgdpcsq    | 0.161<br>(0.598)      | -2.066<br>(1.496)       | -3.300<br>(2.596)       | -0.386<br>(3.243)      | 0.161<br>(1.158)       | 2.571**<br>(1.028)      | -0.230<br>(1.111)      | 1.287**<br>(0.583)    | 0.165<br>(0.504)      | -0.668<br>(1.467)      | 0.509<br>(0.914)        |
| Dummy2005    | -0.0339<br>(0.0476)   | 0.0461*<br>(0.0280)     | 0.0796**<br>(0.0377)    | 0.0651<br>(0.0555)     | -0.0265<br>(0.0208)    | 0.0235<br>(0.0218)      | -0.0308<br>(0.0192)    | -0.0193<br>(0.0184)   | -0.0118<br>(0.0135)   | -0.0377**<br>(0.0184)  | 0.111**<br>(0.0540)     |
| trend        | -0.00118<br>(0.00300) | -0.0168***<br>(0.00456) | -0.0144***<br>(0.00437) | -0.0127**<br>(0.00559) | -0.00792*<br>(0.00408) | -0.0151***<br>(0.00483) | -0.00563*<br>(0.00291) | -0.00109<br>(0.00100) | -0.00157<br>(0.00141) | -0.000490<br>(0.00262) | -0.00834**<br>(0.00349) |
| Constant     | -49.85**<br>(21.69)   | -38.49**<br>(16.17)     | -38.67**<br>(18.28)     | -25.96<br>(16.66)      | -33.39*<br>(18.80)     | -42.16**<br>(19.78)     | -33.26*<br>(18.27)     | -9.359<br>(6.927)     | -20.09**<br>(9.604)   | -8.598<br>(10.00)      | -43.50**<br>(17.16)     |
| Observations | 308                   | 308                     | 308                     | 308                    | 308                    | 308                     | 308                    | 308                   | 308                   | 308                    | 308                     |

Note: Standard errors in parentheses. \*\*\* p<0.01, \*\* p<0.05, \* p<0.1.
